# Supplementary material for: CuInS2/Mg(OH)2 Nanosheets for the Enhanced Visible-Light Photocatalytic Degradation of Tetracycline
Source: PubMed Central journal article supplement (PMC6915496; doi:10.3390/nano9111567), 2019-11-05
Supplement: nanomaterials-09-01567-s001.pdf [file nanomaterials-09-01567-s001.pdf]

## Supported Information

### CuInS<sub>2</sub>/Mg(OH)<sub>2</sub> nanosheets for the enhanced visible-light photocatalytic degradation of tetracycline

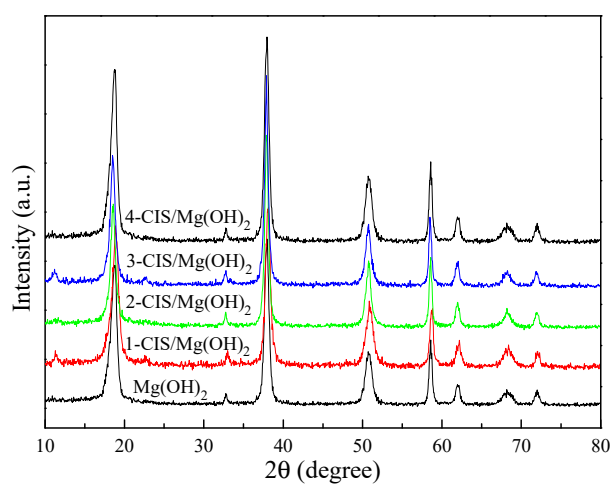

**Figure S1.** XRD patterns of Mg(OH)<sub>2</sub> and CIS/Mg(OH)<sub>2</sub>.

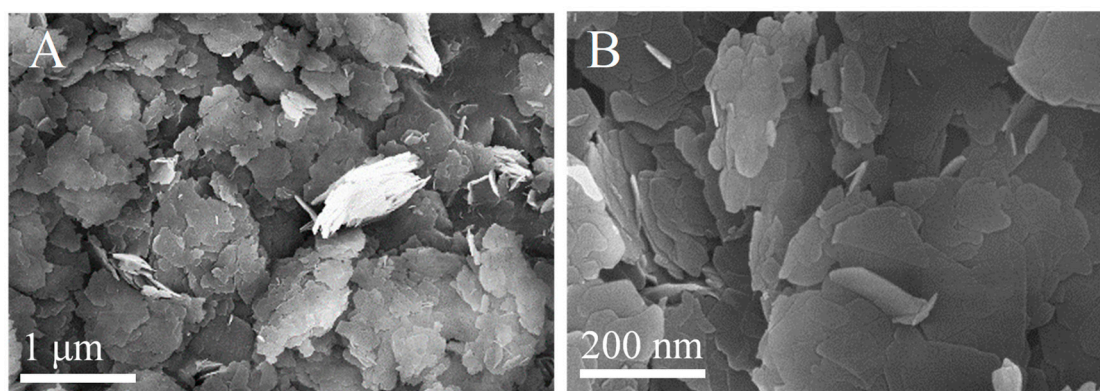

**Figure S2.** SEM images of Mg(OH)<sub>2</sub>.

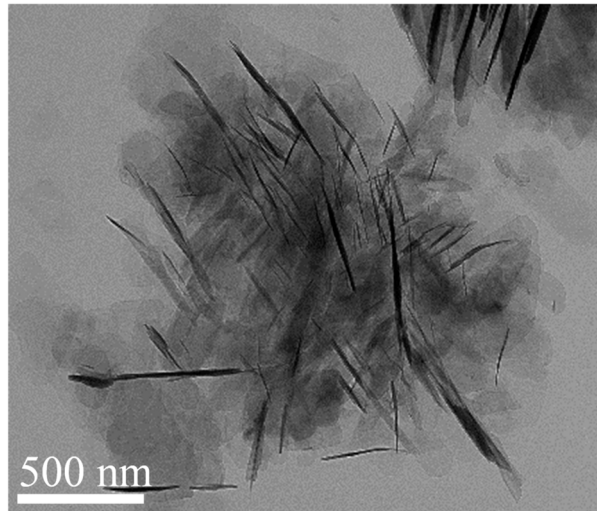

**Figure S3.** TEM images of 2-CIS/Mg(OH)<sub>2</sub>.

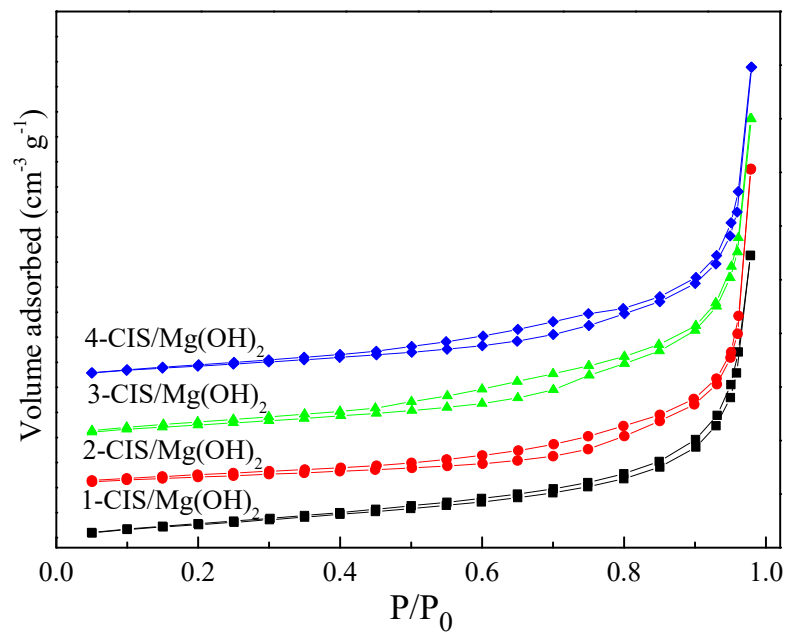

**Figure S4.** N<sub>2</sub> adsorption-desorption curves of CIS/Mg(OH)<sub>2</sub> with varying CuInS<sub>2</sub> content.

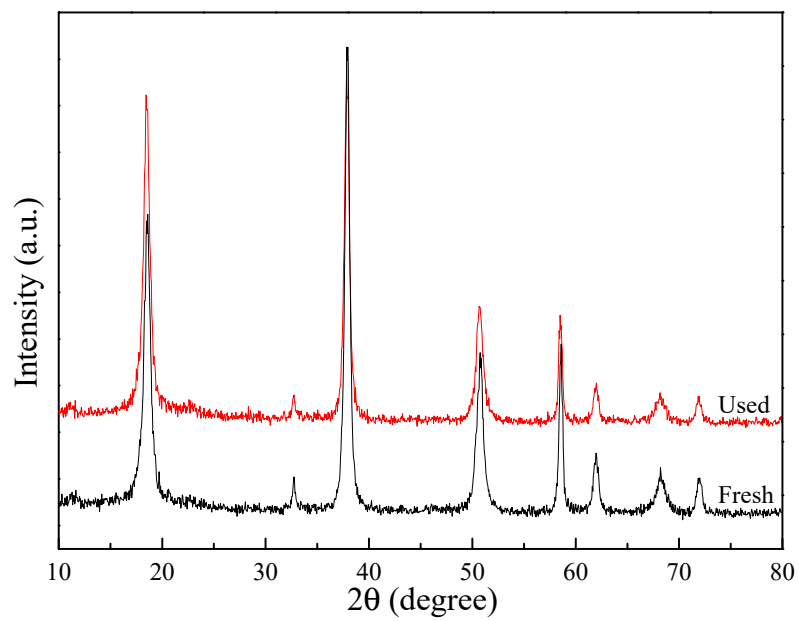

**Figure S5.** XRD patterns of fresh and used 2-CIS/Mg(OH)<sub>2</sub>.

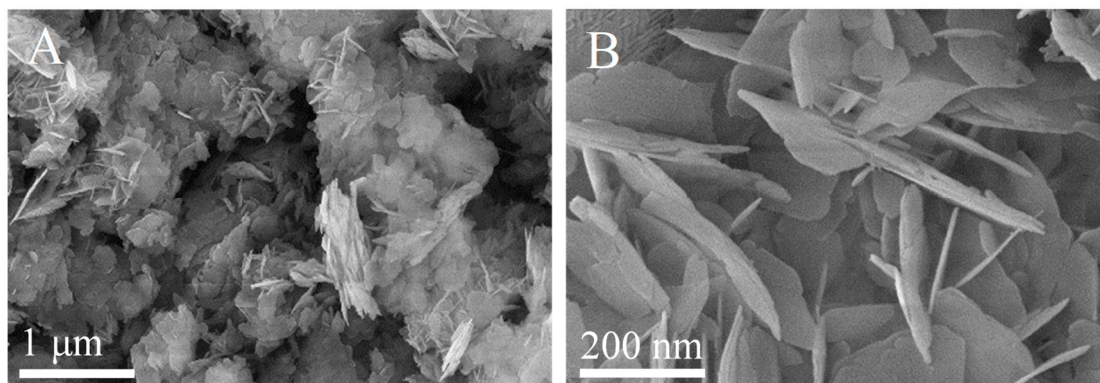

**Figure S6.** SEM images of used 2-CIS/Mg(OH)<sub>2</sub>.

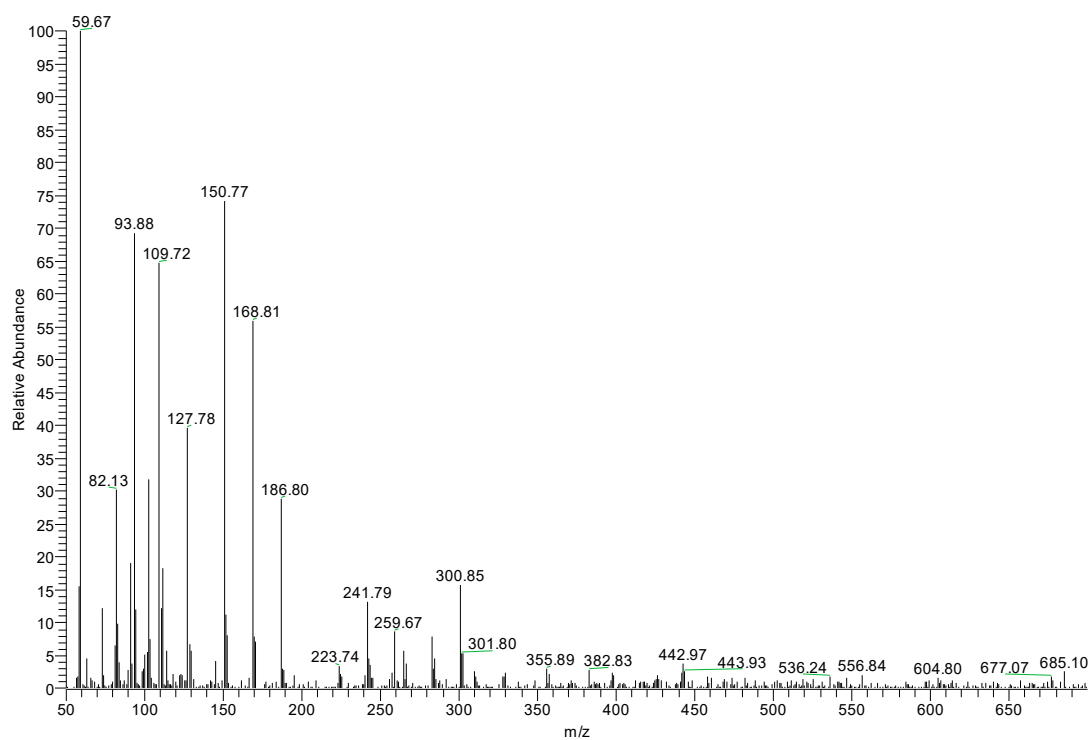

**Figure S7.** HPLC/MS spectrum of TCH solution under visible-light irradiation of 30 min over 2-CIS/Mg(OH)<sub>2</sub>.

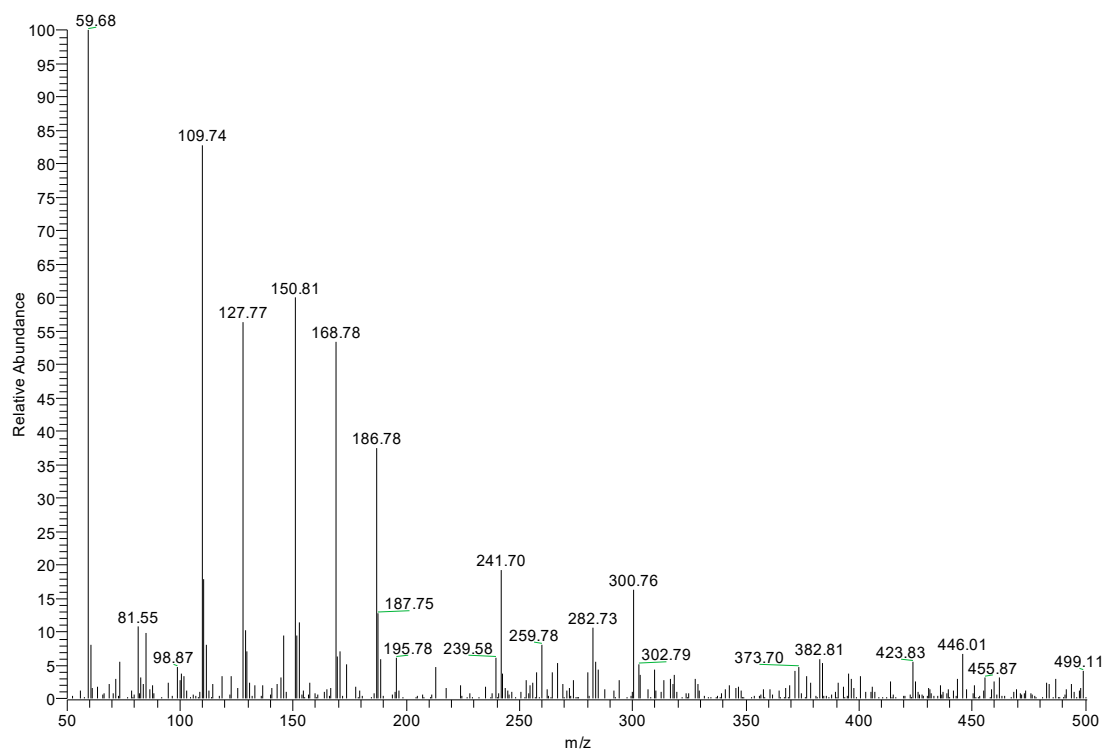

**Figure S8.** HPLC/MS spectrum of TCH solution under visible-light irradiation of 60 min over 2-CIS/Mg(OH)<sub>2</sub>.

**Table S1.** Texture parameters of CIS/Mg(OH)<sub>2</sub>-based samples.

| Samples                                     | BET surface                            | Pore volume                        | Pore diameter | Metallic content (%) <sup>a</sup> |      |      |
|---------------------------------------------|----------------------------------------|------------------------------------|---------------|-----------------------------------|------|------|
|                                             | area (m <sup>2</sup> g <sup>-1</sup> ) | (cm <sup>3</sup> g <sup>-1</sup> ) | (nm)          | Mg                                | Cu   | In   |
| 1-CIS/Mg(OH) <sub>2</sub>                   | 46.7                                   | 1.25                               | 3.06          | 40.59                             | 0.51 | 0.92 |
| 2-CIS/Mg(OH) <sub>2</sub>                   | 38.8                                   | 1.09                               | 3.21          | 39.15                             | 1.04 | 1.73 |
| 3-CIS/Mg(OH) <sub>2</sub>                   | 33.4                                   | 0.98                               | 3.64          | 38.86                             | 1.67 | 3.10 |
| 4-CIS/Mg(OH) <sub>2</sub>                   | 30.5                                   | 0.91                               | 3.52          | 37.69                             | 1.83 | 3.41 |
| Used 2-CIS/Mg(OH) <sub>2</sub> <sup>c</sup> | /                                      | /                                  | /             | 38.52                             | 0.98 | 1.75 |

<sup>a</sup> The contents of metallic elements was measured by ICP-OES.

<sup>b</sup> The atomic contents of metallic elements was measured by XPS.

<sup>c</sup> The used composite was not detected by N<sub>2</sub>-sorption for the BET, pore volume and pore diameter.

**Table S2.** The parameters of Surface roughness of 2-CIS/Mg(OH)<sub>2</sub>.

| Samples                     | R <sub>a</sub> (nm) <sup>a</sup> | R <sub>q</sub> (nm) <sup>b</sup> | S <sub>sk</sub> <sup>c</sup> |
|-----------------------------|----------------------------------|----------------------------------|------------------------------|
| Fresh                       | 8.90                             | 15.40                            | 2.80                         |
| Adsorption <sup>d</sup>     | 44.2                             | 58.7                             | 0.45                         |
| Photocatalysis <sup>e</sup> | 1.77                             | 3.09                             | 3.06                         |
| Used <sup>f</sup>           | 1.20                             | 1.62                             | 1.00                         |

<sup>a</sup> R<sub>a</sub> was the average roughness, nm.

<sup>b</sup> R<sub>q</sub> was the root mean square roughness, nm.

<sup>c</sup> S<sub>sk</sub> was the surface skewness.

<sup>d</sup> The adsorption time is 2.0 h.

<sup>e</sup> The photocatalytic time is 30 min.

<sup>f</sup> The photocatalytic time is 60 min.

**Table S3.** The adsorption-photocatalysis capacities of CIS/Mg(OH)<sub>2</sub> samples.

| Samples                   | Adsorption                           |                             | photocatalysis          |                             | Removal (%) |
|---------------------------|--------------------------------------|-----------------------------|-------------------------|-----------------------------|-------------|
|                           | C <sub>0</sub> (mg L <sup>-1</sup> ) | Efficiency <sup>a</sup> (%) | C (mg L <sup>-1</sup> ) | Efficiency <sup>b</sup> (%) |             |
| Mg(OH) <sub>2</sub>       | 26.75                                | 46.50                       | 12.51                   | 53.23                       | 74.98       |
| 1-CIS/Mg(OH) <sub>2</sub> | 38.02                                | 23.96                       | 3.14                    | 91.74                       | 93.71       |
| 2-CIS/Mg(OH) <sub>2</sub> | 37.54                                | 24.92                       | 0.03                    | 99.92                       | 99.95       |
| 3-CIS/Mg(OH) <sub>2</sub> | 39.23                                | 21.54                       | 4.68                    | 88.07                       | 90.64       |
| 4-CIS/Mg(OH) <sub>2</sub> | 37.70                                | 24.60                       | 2.58                    | 93.16                       | 94.83       |

<sup>a</sup> Adsorption efficiency =  $(50-C_0)/50 \times 100\%$ . <sup>b</sup> Photocatalysis efficiency =  $(C_0-C)/C_0 \times 100\%$ .

Conditions: TCH concentration of 50 mg L<sup>-1</sup>, Photocatalyst bulks of 50 mg, TCH solution volume of 100 mL, Light power intensity of 600 mW cm<sup>-2</sup>, pH value of 4.65 and Adsorption time of 2.0 h.

**Table S4.** Effect of pH value on the adsorption-photocatalysis capacities of 2-CIS/Mg(OH)<sub>2</sub>.

| pH   | Adsorption                           |                             | photocatalysis          |                             | Removal (%) |
|------|--------------------------------------|-----------------------------|-------------------------|-----------------------------|-------------|
|      | C <sub>0</sub> (mg L <sup>-1</sup> ) | Efficiency <sup>a</sup> (%) | C (mg L <sup>-1</sup> ) | Efficiency <sup>b</sup> (%) |             |
| 3.17 | 40.75                                | 18.50                       | 4.46                    | 89.06                       | 91.09       |
| 4.65 | 37.54                                | 24.92                       | 0.03                    | 99.92                       | 99.95       |
| 5.83 | 34.63                                | 30.74                       | 5.06                    | 85.39                       | 89.89       |
| 7.42 | 27.18                                | 45.64                       | 5.56                    | 79.54                       | 88.87       |
| 8.76 | 37.28                                | 25.44                       | 4.66                    | 87.50                       | 90.67       |

<sup>a</sup> Adsorption efficiency =  $(50-C_0)/50 \times 100\%$ . <sup>b</sup> Photocatalysis efficiency =  $(C_0-C)/C_0 \times 100\%$ .

TCH concentration of 50 mg L<sup>-1</sup>, Photocatalyst bulks of 50 mg, TCH solution volume of 100 mL, Light power intensity of 600 mW cm<sup>-2</sup> and Adsorption time of 2.0 h.

**Table S5.** Effect of inorganic ions on the adsorption-photocatalysis capacities of 2-CIS/Mg(OH)<sub>2</sub>.

| Samples                         | Adsorption                           |                             | photocatalysis          |                             | Removal (%) |
|---------------------------------|--------------------------------------|-----------------------------|-------------------------|-----------------------------|-------------|
|                                 | C <sub>0</sub> (mg L <sup>-1</sup> ) | Efficiency <sup>a</sup> (%) | C (mg L <sup>-1</sup> ) | Efficiency <sup>b</sup> (%) |             |
| Blank                           | 37.54                                | 24.92                       | 0.03                    | 99.92                       | 99.95       |
| NaCl                            | 37.69                                | 24.62                       | 3.95                    | 89.52                       | 92.09       |
| Na <sub>2</sub> SO <sub>4</sub> | 38.42                                | 23.16                       | 4.79                    | 87.53                       | 90.43       |
| Na <sub>2</sub> CO <sub>3</sub> | 42.17                                | 15.66                       | 6.53                    | 84.52                       | 86.94       |
| Na <sub>3</sub> PO <sub>4</sub> | 46.47                                | 7.06                        | 9.22                    | 80.16                       | 81.55       |

<sup>a</sup> Adsorption efficiency =  $(50-C_0)/50 \times 100\%$ . <sup>b</sup> Photocatalysis efficiency =  $(C_0-C)/C_0 \times 100\%$ .

TCH concentration of 50 mg L<sup>-1</sup>, Photocatalyst bulks of 50 mg, TCH solution volume of 100 mL, Visible-light power intensity of 600 mW cm<sup>-2</sup>, pH value of 4.65 and Adsorption time of 2.0 h.

**Table S6.** Comparison of photocatalytic performance for removal of organic pollutants.

| Samples                                                                | Light source      |       | Organic pollutants |                        |        | $\eta^b$ (%) | Ref.    |
|------------------------------------------------------------------------|-------------------|-------|--------------------|------------------------|--------|--------------|---------|
|                                                                        | Type <sup>a</sup> | P (W) | Type               | C(mg L <sup>-1</sup> ) | T(min) |              |         |
| Ag/TiO <sub>2</sub>                                                    | Xe                | 300   | Tetracycline       | 30                     | 600    | 90.0         | 8       |
| MgO@N-C                                                                | Xe                | 300   | Tetracycline       | 400                    | 70     | 92.20        | 15      |
| Fe <sub>2</sub> O <sub>3</sub> @TiO <sub>2</sub> composites            | Xe                | 300   | Tetracycline       | 50                     | 90     | 100          | 16      |
| CuInS <sub>2</sub> /g-C <sub>3</sub> N <sub>4</sub>                    | Xe                | 300   | Tetracycline       | 20                     | 60     | 83.70        | 31      |
| TiO <sub>2</sub>                                                       | Hg                | 9     | Tetracycline       | 30                     | 90     | 78.2         | 55      |
| Core-shell TiO <sub>2</sub> @ $\alpha$ -Fe <sub>2</sub> O <sub>3</sub> | Xe                | 300   | Methyl orange      | 10                     | 16     | 96.6         | 56      |
| Core-shell Fe <sub>2</sub> O <sub>3</sub> /TiO <sub>2</sub>            | Hg                | 450   | Paracetamol        | 50                     | 90     | 87.8         | 57      |
| Flower-like $\alpha$ -Fe <sub>2</sub> O <sub>3</sub> @TiO <sub>2</sub> | Hg                | 300   | Acid orange 7      | 10                     | 90     | 98.6         | 58      |
| $\alpha$ -Fe <sub>2</sub> O <sub>3</sub> @TiO <sub>2</sub> nanorods    | Hg                | 300   | Rhodamine B        | 100                    | 120    | 100          | 59      |
| TiO <sub>2</sub> P-25                                                  | Hg                | 125   | Tetracycline       | 40                     | 120    | 100          | 60      |
| 2-CIS/Mg(OH) <sub>2</sub>                                              | Xe                | 300   | Tetracycline       | 50                     | 60     | 99.95        | Present |

<sup>a</sup> Hg lamp were the UV-light sources, and Xe lamp was the visible-light source.

<sup>b</sup>  $\eta$  was the total removal efficiency of organic pollutant.
